# Supplementary material for: Common Microbial Genital Infections and Their Impact on the Innate Immune Response to HPV in Cervical Cells
Source: MDPI journal article supplement (doi:10.3390/pathogens11111361), 2022-11-16
Supplement: s1 [file s1]

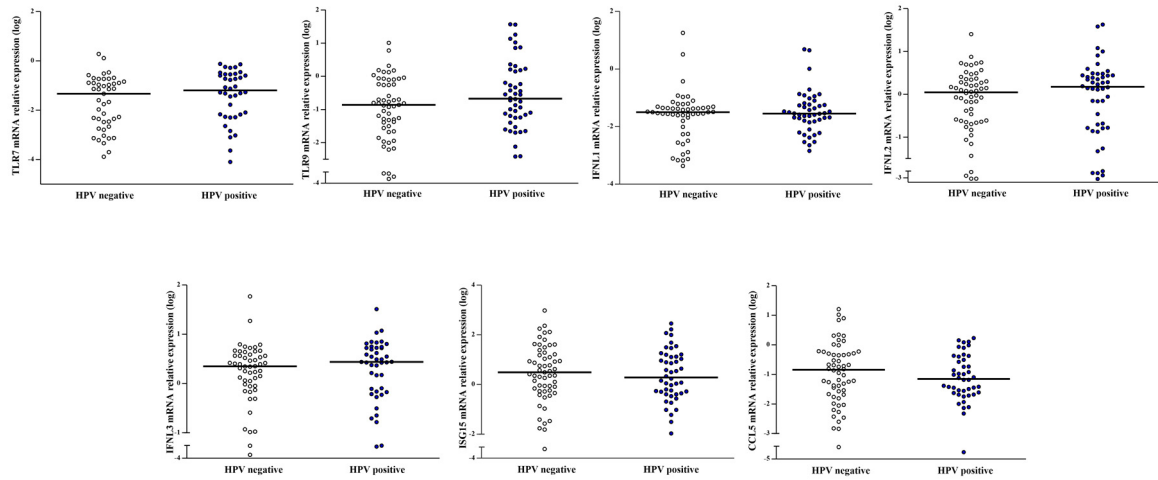

Figure S1: gene expression levels of TLR7, TLR9, IFNL1, IFNL2, IFNL3, ISG15, and CCL5 in cervical mucosa cells of HPV-negative and HPV-positive women. Relative mRNA expression values ( $y$ -axis), calculated using the threshold cycle relative quantification ( $2^{-\Delta Ct}$ ) and log-transformed, are reported. Horizontal lines indicate the median value of the group indicated below the  $x$ -axis. All  $p$ -values calculated using Mann–Whitney tests for comparisons between two groups were  $>0.05$ .

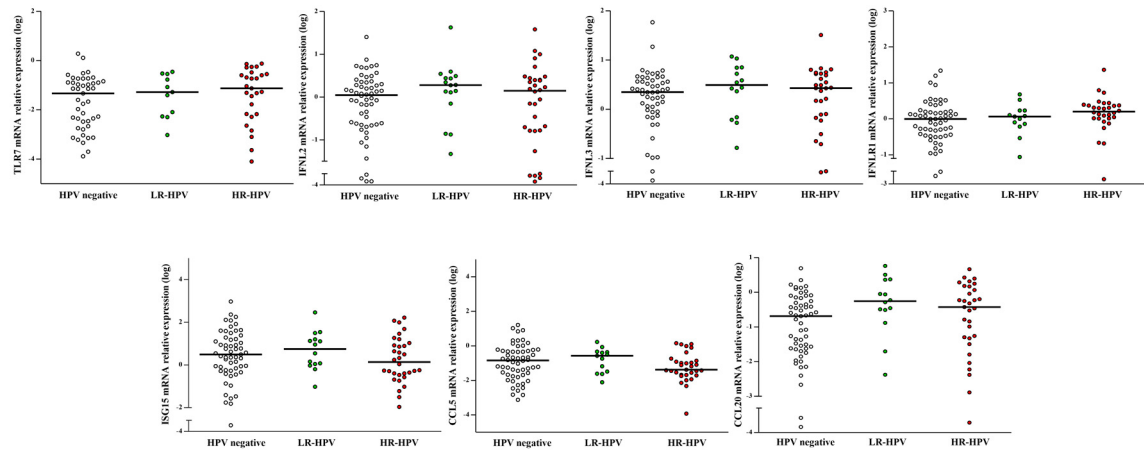

Figure S2: gene expression levels of TLR7, IFNL2, IFNL3, IFNL1, ISG15, CCL5, and CCL20 in cervical mucosa cells of HPV-negative and HPV-positive women. Relative mRNA expression values ( $y$ -axis), calculated using the threshold cycle relative quantification ( $2^{-\Delta Ct}$ ) and log-transformed, are reported. Horizontal lines indicate the median value of the group indicated below the  $x$ -axis. All  $p$ -values calculated using Kruskal–Wallis tests for comparisons between three groups were  $>0.05$ .

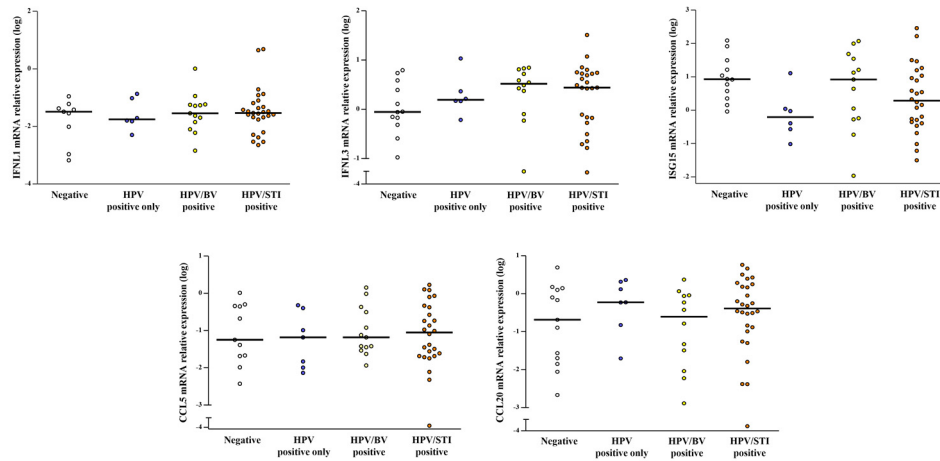

Figure S3: Gene expression levels of IFNL1, IFNL3, ISG15, CCL5, and CCL20 in cervical mucosa cells of negative, HPV-positive, HPV/BV-positive, and HPV/STI-positive women. Relative mRNA expression values ( $y$ -axis), calculated using the threshold cycle relative quantification ( $2^{-\Delta C_t}$ ) and log-transformed, are reported for the genes. Horizontal lines indicate the median value of the group indicated below the  $x$ -axis. All  $p$ -values calculated with the Jonckheere–Terpstra (JT) test for trends were  $>0.05$ .

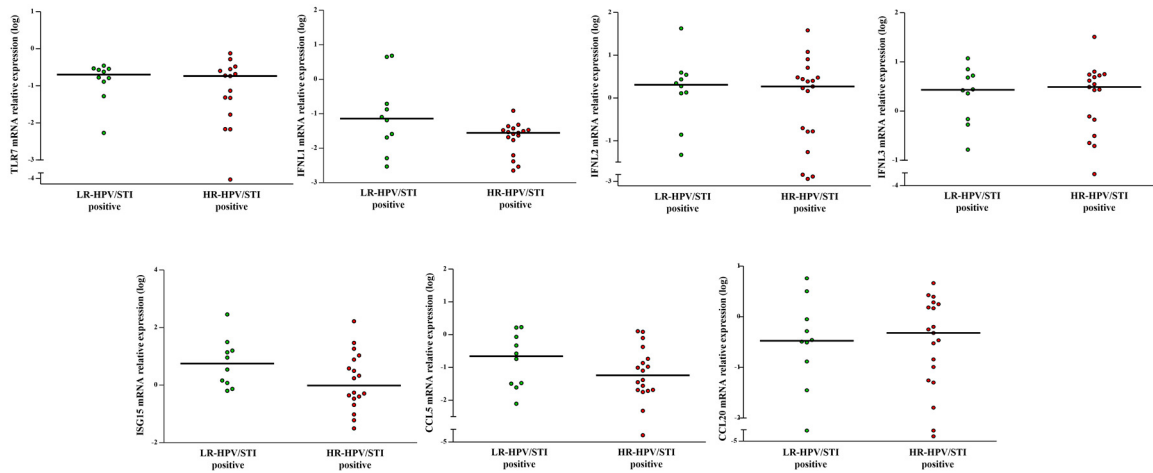

Figure S4: Gene expression levels of TLR7, IFNL1, IFNL2, IFNL3, ISG15, CCL5, and CCL20 in cervical mucosa cells of LR-HPV/STI-positive and HR-HPV/STI-positive women. Relative mRNA expression values ( $y$ -axis), calculated using the threshold cycle relative quantification ( $2^{-\Delta C_t}$ ) and log-transformed, are reported for the genes. Horizontal lines indicate the median value of the group indicated below the  $x$ -axis. All  $p$ -values calculated with Mann–Whitney tests for comparisons between two groups were  $>0.05$ .
